# Supplementary material for: PERK/NRF2 and autophagy form a resistance mechanism against G9a inhibition in leukemia stem cells
Source: PubMed Central journal article supplement (PMC7158163; doi:10.1186/s13046-020-01565-3), 2020-04-15
Supplement: 13046_2020_1565_MOESM1_ESM.pdf [file 13046_2020_1565_MOESM1_ESM.pdf]

**Table S1. Synergistic effects of the G9a inhibitor and PERK inhibitor on apoptosis of primary acute myeloid LSCs**

| Patient No. | Sex/<br>Age<br>(years) | Chromosome | Mutation                   |             | CD34<br>, % | BIX (5 $\mu$ M, 48 h)                                                      |                                                                                              | GSK (10 $\mu$ M, 48 h)                                                     |                                                                                              | BIX+GSK                                                                    |                                                                                              |
|-------------|------------------------|------------|----------------------------|-------------|-------------|----------------------------------------------------------------------------|----------------------------------------------------------------------------------------------|----------------------------------------------------------------------------|----------------------------------------------------------------------------------------------|----------------------------------------------------------------------------|----------------------------------------------------------------------------------------------|
|             |                        |            | <i>FLT3</i><br><i>-ITD</i> | <i>NPM1</i> |             | Annexin V <sup>+</sup><br>7AAD <sup>+</sup> of<br>CD34 <sup>+</sup><br>, % | Annexin V <sup>+</sup><br>7AAD <sup>+</sup> of<br>CD34 <sup>+</sup> CD38 <sup>+</sup><br>, % | Annexin V <sup>+</sup><br>7AAD <sup>+</sup> of<br>CD34 <sup>+</sup><br>, % | Annexin V <sup>+</sup><br>7AAD <sup>+</sup> of<br>CD34 <sup>+</sup> CD38 <sup>+</sup><br>, % | Annexin V <sup>+</sup><br>7AAD <sup>+</sup> of<br>CD34 <sup>+</sup><br>, % | Annexin V <sup>+</sup><br>7AAD <sup>+</sup> of<br>CD34 <sup>+</sup> CD38 <sup>+</sup><br>, % |
| YH03        | M/48                   | 46,XY[20]  | Neg                        | Neg         | 73.3        | 14.7                                                                       | -                                                                                            | 21.7                                                                       | -                                                                                            | 41.0                                                                       | -                                                                                            |
| YH04        | M/41                   | 46,XY[20]  | Neg                        | Neg         | 98.4        | 21.4                                                                       | -                                                                                            | 26.5                                                                       | -                                                                                            | 48.3                                                                       | -                                                                                            |
| YH05        | M/68                   | 46,XY[20]  | Neg                        | Neg         | 73.8        | 26.2                                                                       | 15.1                                                                                         | 16.5                                                                       | 22.7                                                                                         | 71.2                                                                       | 51.5                                                                                         |
| YH06        | F/74                   | 46,XX[20]  | Neg                        | Neg         | 81.0        | 19.5                                                                       | -                                                                                            | 20.7                                                                       | -                                                                                            | 49.0                                                                       | -                                                                                            |
| YH08        | F/39                   | 46,XX[20]  | Pos                        | Neg         | 95.1        | 23.8                                                                       | -                                                                                            | 24.5                                                                       | -                                                                                            | 61.2                                                                       | -                                                                                            |
| YH09        | M/46                   | 46,XX[15]  | Pos                        | Neg         | 76.9        | 24.8                                                                       | -                                                                                            | 31.2                                                                       | -                                                                                            | 63.4                                                                       | -                                                                                            |
| YH10        | M/39                   | 46,XY[20]  | Neg                        | Neg         | 74.0        | 29.2                                                                       | -                                                                                            | 27.3                                                                       | -                                                                                            | 65.4                                                                       | -                                                                                            |
| YH11        | M/56                   | 46,XY[10]  | Neg                        | Neg         | 92.1        | 19.1                                                                       | 11.9                                                                                         | 28.3                                                                       | 32.9                                                                                         | 70.0                                                                       | 76.2                                                                                         |
| YH12        | F/79                   | 46,XX[22]  | Neg                        | Neg         | 73.5        | 33.5                                                                       | 34.0                                                                                         | 32.1                                                                       | 42.7                                                                                         | 82.3                                                                       | 83.2                                                                                         |
| YH13        | M/61                   | 46,XY[21]  | Pos                        | Neg         | 94.7        | 14.9                                                                       | -                                                                                            | 35.6                                                                       | -                                                                                            | 80.6                                                                       | -                                                                                            |
| YH14        | F/67                   | 46,XX[22]  | Neg                        | NA          | 65.1        | 38.6                                                                       | 34.2                                                                                         | 21.4                                                                       | 16.1                                                                                         | 73.2                                                                       | 68.4                                                                                         |
| YH15        | F/18                   | 46,XX[24]  | Neg                        | Neg         | 67.3        | 19.7                                                                       | -                                                                                            | 15.6                                                                       | -                                                                                            | 45.9                                                                       | -                                                                                            |
| YH16        | F/59                   | 46,XX[23]  | Neg                        | Neg         | 59.0        | 19.0                                                                       | 9.3                                                                                          | 28.1                                                                       | 23.7                                                                                         | 46.2                                                                       | 31.5                                                                                         |
| YH18        | M/70                   | 46,XY[20]  | Pos                        | NA          | 58.1        | 29.8                                                                       | -                                                                                            | 8.1                                                                        | -                                                                                            | 44.6                                                                       | -                                                                                            |
| YH19        | M/24                   | 46,XY[20]  | Pos                        | NA          | 96.8        | 34.6                                                                       | 24.4                                                                                         | 29.0                                                                       | 17.7                                                                                         | 70.8                                                                       | 60.8                                                                                         |
| YH20        | M/75                   | 46,XY[20]  | NA                         | NA          | 57.3        | 27.9                                                                       | 16.3                                                                                         | 10.5                                                                       | 8.8                                                                                          | 53.1                                                                       | 43.9                                                                                         |
| Donor01     | M/25                   | —          | —                          | —           | 85.6        | 15.7                                                                       | 15.2                                                                                         | 17.6                                                                       | 16.9                                                                                         | 21.7                                                                       | 22.0                                                                                         |
| Donor02     | M/60                   | —          | —                          | —           | 68.8        | 14.7                                                                       | 16.7                                                                                         | 12.3                                                                       | 7.4                                                                                          | 17.0                                                                       | 13.9                                                                                         |
| Donor03     | M/64                   | —          | —                          | —           | 59.4        | 22.7                                                                       | 22.3                                                                                         | 10.4                                                                       | 8.2                                                                                          | 25.3                                                                       | 23.1                                                                                         |
| Donor04     | M/58                   | —          | —                          | —           | 60.2        | 20.9                                                                       | 19.2                                                                                         | 15.7                                                                       | 14.4                                                                                         | 23.8                                                                       | 19.5                                                                                         |
| Donor05     | M/19                   | —          | —                          | —           | 60.5        | 9.6                                                                        | 9.8                                                                                          | 10.9                                                                       | 11.6                                                                                         | 14.9                                                                       | 16.2                                                                                         |

Neg, negative; Pos, positive; NA, not applicable; BM, bone marrow

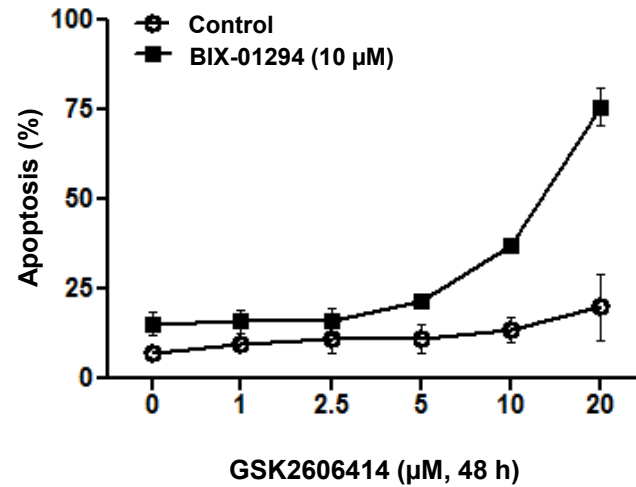

**Supplementary Figure S1.** KG1 cells were incubated with various concentrations of GSK2606414 for 48 h in the presence or absence of 10 µM BIX-01294, and the fraction of apoptotic cells was analyzed using Annexin-V/PI exclusion and flow-cytometric analysis.

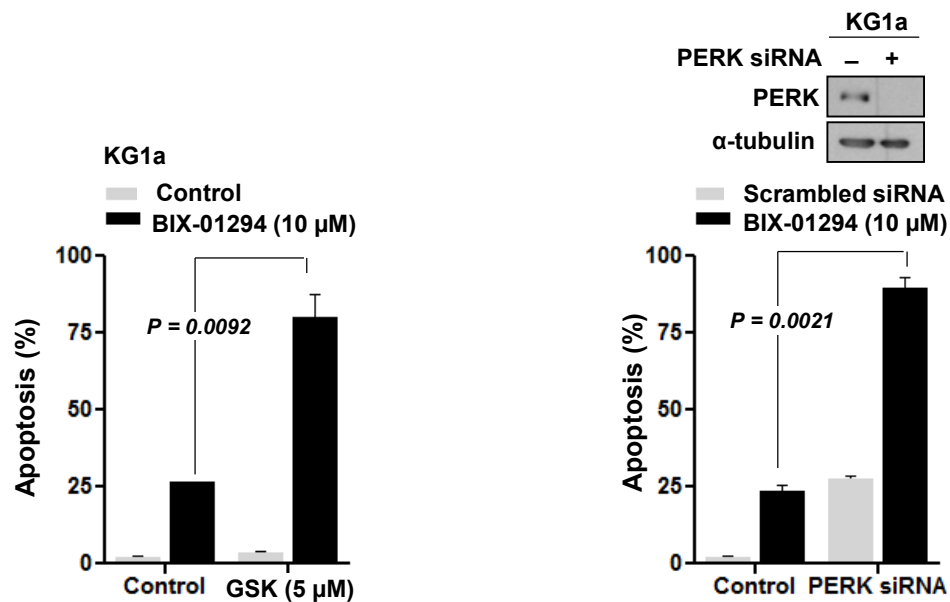

**Supplementary Figure S2.** (A) KG1a cells were treated with 10 μM BIX-01294 in the presence or absence of the PERK inhibitor GSK260641 at 5 μM. After incubation for 48 h, the apoptotic fraction was measured using Annexin-V/PI-based flow-cytometric analysis. Data are the means ± SDs of three independent experiments. (B) For PERK inhibition experiments, KG1a cells were transfected with PERK siRNA or scrambled siRNA as described in the Materials and Methods. KG1 cells were treated with 10 μM BIX-01294 for 48 h in the absence or presence of PERK siRNA. Scrambled siRNA was used as a control. The levels of apoptosis were determined using flow-cytometric analyses. Data are the means ± SDs of three independent experiments.

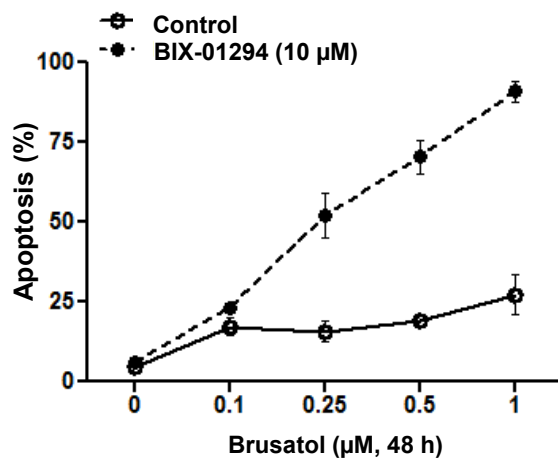

**Supplementary Figure S3.** KG1 cells were incubated with various concentrations of brusatol for 48 h in the presence or absence of 10 µM BIX-01294, and the fraction of apoptotic cells was analyzed using Annexin-V/PI exclusion and flow-cytometric analysis.

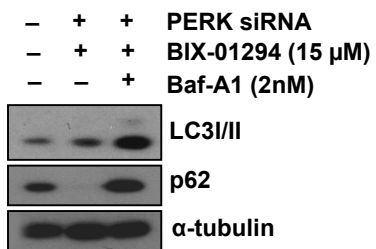

**Supplementary Figure S4.** KG1 cells were transfected with PERK siRNA or scrambled siRNA and treated with 10  $\mu$ M BIX-01294 for 24 h in the absence or presence of 2 nM bafilomycin A1. Scrambled siRNA was used as a control. After incubation, cell lysates were subjected to western blotting using the indicated antibodies.
